# Supplementary material for: GenomeVIP: a cloud platform for genomic variant discovery and interpretation
Source: HighWire-hosted journal article supplement (doi:10.1101/gr.211656.116), 2017-05-18
Supplement: Supplemental_Information.docx [file Supplemental_Information.docx]

**SUPPLEMENTAL INFORMATION**

***Description of data***

**Germline**: Three non-related donors were selected from each of three 1000 Genomes Project population groups (NA18526, NA18571, and NA18638 from CHB; NA18486, NA19093, NA19257 from YRI; HG00174, HG00331, HG00377 from FIN). Analysis was performed on chr20 from the low-coverage Phase 1 samples. Raw data were generated with GenomeVIP on Amazon Web Services (AWS) and verified using local runs. The GenomeVIP dataset consisted of VarScan raw SNVs and a downstream/offline union of raw indels from VarScan and filtered, high-quality indels from Pindel. The GotCloud dataset consisted of unmodified files chr20.filtered.PASS.vcf.gz (for SNVs) and files all.genotypes.vcf.gz (for indels). Annotation of all call sets was performed offline using the GenomeVIP dbSNP annotation script module. Software versions used: VarScan 2.3.8; Pindel 0.2.5b5; SAMtools 1.2; GotCloud 1.14.4 (ami-6ae65e02); dbSNP (NCBI, 142/GRCh37.p13, unmodified).

**Somatic**: Matched tumor/normal samples were provided by the ICGC-TCGA DREAM Somatic Mutation Calling (SMC) Challenge #3. Raw data were generated using GenomeVIP on AWS using VarScan and Strelka and verified using local runs. GenomeVIP’s dbSNP filtering script module was applied to obtain novel somatic mutations. Multiple variations of false-positive filter parameters were applied using GenomeVIP’s filtering modules and carried out in parallel. The parameters and values tested are as follows: minimum number of variant-supporting reads, VSR (2, 4); average relative distance of variant to 3’ end, RDTP (0.10, 0.20); maximum mismatch quality sum for variant reads, MMQSVR (50, 100, 150); maximum average mismatch quality sum difference (var–ref), MMQSD (50, 100); minimum reference and variant allele average mapping qualities, MMQ (15, 20, 30); maximum average mapping quality difference (ref–var), MMQD (20, 30). Comparisons to the published “truth” set were carried out using SMC’s downloadable evaluator Python script (github.com / Sage-Bionetworks / ICGC-TCGA-DREAM-Mutation-Calling-challenge-tools/), which evaluates variants within pre-defined, unmasked genomic regions. Strelka produced 17,236 raw calls, of which 6,794 were in unmasked/evaluated regions; 13,384 of these raw calls were novel, of which 6,638 were positioned in unmasked/evaluated regions. VarScan produced 159,554 raw calls, of which 158,167 were in unmasked/evaluated regions; 137,377 of its raw calls were novel, of which 136,066 were positioned in unmasked/evaluated regions. The lowest false positive rate (0.78%) was found by intersecting corresponding novel-variant call sets obtained using MMQ=30, RDTP=0.20, MMQD=20, and VSR=4, independent of MMQSVR and MMQSD values. The greatest true positive rate (88.3%) was found by merging corresponding novel-variant call sets obtained using MMQ=15, RDTP=0.10, MMQD=30, and VSR=2, independent of MMQSVR and MMQSD. Software versions used: VarScan 2.3.8; Strelka 1.0.14, with default parameters; SAMtools 0.1.18; dbSNP (NCBI, 138/GRCh37.p10, curated).

***De novo***: The family trio NA12891-NA12892-NA12878 from the 1000 Genomes Project’s CEU population was selected for *de novo* discovery. High-coverage Illumina Platinum Genomes (www.illumina.com / platinumgenomes/) were downloaded (European Nucleotide Archives; ERA172924) and raw calls were generated (N=18,137) using the VarScan module in GenomeVIP both locally and on AWS with agreement. Application of GenomeVIP’s false-positives filtering module removed 12,898 calls, leaving 5,239 available for comparison and further refinement. An additional 2,808 sites were deemed subject to removal depending on the allowed number of variant supporting reads in the parental genomes. (Software versions used: VarScan 2.3.8; SAMtools 1.2.) *De novo* SNV prediction and validation studies (Conrad et al. 2011) identified 3,236 candidate sites that were resolved as 49 germline *de novo*, 952 somatic *de novo*, 1,304 false positives, 129 inherited variant, and 802 no-calls.

***Description of GenomeVIP modules***

GenomeVIP contains several auxiliary scripts, including ones for performing filtering and annotation:

***bam_filter.sh***: removes BreakDancer calls having variant read support in the normal sample (somatic case) or in the parents’ samples (*de novo* case)

***pindel_filter.pl***: filters Pindel germline, somatic, or *de novo* variant calls based on coverage, variant allele frequency thresholds, presence of unbalanced reads (i.e., strand filter), indel complexity, and number of homopolymer repeat units.

***snv_filter.pl***: performs false-positive filtering on SNVs using the utility *bam-readcount* (github.com/ genome/ bam-readcount/) and the VarScan *fpfilter* subcommand.

***trio_hcfilter.pl***: removes VarScan *de novo* calls having combined variant read support from parents above threshold value.

***dbsnp_filter.pl***: uses SnpSift (Cingolani et al. 2012) to annotate or filter calls based on overlap with a specified database, e.g., dbSNP or ClinVar (Landrum et al. 2016) (www.ncbi.nlm.nih.gov/clinvar/), resulting in the identification of potentially novel variants.

***vep_annotator.pl***: annotates variants using the Ensembl Variant Effect Predictor (VEP) software (McLaren et al. 2010) with the offline database option. The GenomeVIP run-time machine image (see above) supports NCBI’s dbSNP v.142 (unmodified) for GRCh37 and GRCh38 human assemblies and VEP release 81 and ClinVar version 20160104 for GRCh37.

The VarScan workflow in GenomeVIP contains a stream filter to remove malformed read pileups based on a check of column count and utility scripts to process somatic and *de novo* raw results. GenomeVIP has the ability to gather results produced by multiple genomic regions into a single file and relies on the VCFtools (Danecek et al. 2011) software package to concatenate and sort VCF files.

***Operational notes***

GenomeVIP performs extensive logging, which facilitates error handling and recovery. System-level errors, for example a job crash because memory limit is exceeded, are among the most common and are handled via “sentinel” files representing individual components of a job. These can be queried to help users re-run incomplete portions of the job using the original stored execution profile.

***Tools used for performance comparisons***

We used GNU/Linux command line tools and simple customized scripts to perform tasks such as comparing call sets generated on the cloud versus a local cluster, parsing batch job manager log files, and obtaining filesystem metadata. Comparison of GenomeVIP’s somatic calls to a known truth set was performed outside of GenomeVIP using python-based evaluator script (github.com / Sage-Bionetworks / ICGC-TCGA-DREAM-Mutation-Calling-challenge-tools/). Variant coordinates from the experimental validation study(Conrad et al. 2011) were lifted over from GRCh36 to GRCh37 using the Genome Browser (genome.ucsc.edu) before comparing them to GenomeVIP’s results.

***Computational resource summary***

We report various computing performance data for the genomic application examples above. The amount of resources consumed generally depends on the genomics aspects (i.e., amount of sequence data input and analysis methods, or execution profile, used) as well as on the computational infrastructure (e.g., processor frequency and availability, disk availability and bandwidth, and network bandwidth) and computational approach (e.g., parallelism). The numerical values listed below derive from job manager logs and filesystem metadata.

Germline example: VarScan SNV/indel caller, raw calls only: 4.6 cpu-h total with up to 2.0 GB vmem for each sample (on AWS); 4.8 cpu-h total with up to 0.5 GB resident memory and 1.1 GB swap for each sample (on local cluster). Pindel caller, raw calls only: 34.5 cpu-h total with up to 6.1 GB vmem each sample (on AWS); 35.7 cpu-h total with up to 3.2 GB resident memory and 6.1 GB swap for each sample (local run). GotCloud default SNV pipeline as 5-Mb regions: 1.4 cpu-h and < 4.7 GB total memory (on AWS). GotCloud default indel pipeline as 20-Mb regions: 0.13 cpu-h and < 0.5 GB total memory (on AWS). Additional disk space: VarScan and Pindel combined, 0.4 GB; GotCloud, 9.6 GB.

Somatic example: VarScan SNV/indel caller with false-positives filtering: 52.3 cpu-h and 316 GB maximum temporary disk space total with up to 0.6 GB maximum resident memory and 1.2 GB maximum swap for each 10-Mb region (run locally); 43.6 cpu-h total with < 2.2 GB vmem used for each chromosome (on AWS). Strelka (run as 25-Mb windows): 43.8 cpu-h and 75 MB net disk space, with up to 0.5 GB resident memory and 0.6 GB maximum swap (local run, for SNV/indel calling with its native somatic filter); 33.2 cpu-h, 1.9 GB maximum vmem (on AWS, for SNV/indel calling with dbSNP and GenomeVIP false-positives filters).

*De novo* example: VarScan SNV/indel caller (run locally): Raw calls, 149.5 cpu-h total with up to 0.9 GB maximum resident memory and 1.6 GB maximum swap for each 10-Mb region; 5.4 GB disk space for complete analysis. VarScan SNV/indel caller, raw calls with dbSNP and false-positives filters (run on AWS): 136.9 cpu-h total with up to 2.6 GB maximum vmem for each chromosome.

**SUPPLEMENTAL REFERENCES**

Cingolani P, Patel VM, Coon M, Nguyen T, Land SJ, Ruden DM, Lu X. 2012. Using *Drosophila melanogaster* as a model for genotoxic chemical mutational studies with a new program, SnpSift. *Front Genet* **3:** 35.

Conrad DF, Keebler JE, DePristo MA, Lindsay SJ, Zhang Y, Casals F, Idaghdour Y, Hartl CL, Torroja C, Garimella KV, et al. 2011. Variation in genome-wide mutation rates within and between human families. *Nat Genet* **43:** 712–714.

Danecek P, Auton A, Abecasis G, Albers CA, Banks E, DePristo MA, Handsaker R, Lunter G, Marth G, Sherry ST, et al. 2011. The variant call format and VCFtools. *Bioinformatics* **27:** 2156–2158.

Landrum MJ, Lee JM, Benson M, Brown G, Chao C, Chitipiralla S, Gu B, Hart J, Hoffman D, Hoover J, et al. 2016. ClinVar: public archive of interpretations of clinically relevant variants. *Nucleic Acids Res* **44:** D862–D868.

McLaren W, Pritchard B, Rios D, Chen Y, Flicek P, Cunningham F. 2010. Deriving the consequences of genomic variants with the Ensembl API and SNP Effect Predictor. *Bioinformatics* **26:** 2069–2070.
